# Supplementary material
Source: PubMed Central journal article supplement (PMC8247255)
Supplement: 13015_2021_195_MOESM1_ESM.pdf [file 13015_2021_195_MOESM1_ESM.pdf]

## RESEARCH

# Bayesian Optimization with Evolutionary and Structure-Based Regularization for Directed Protein Evolution— Additional File 1

Trevor S. Frisby and Christopher James Langmead\*

\*Correspondence: [cjl@cs.cmu.edu](mailto:cjl@cs.cmu.edu)

Computational Biology  
Department, Carnegie Mellon  
University, 5000 Forbes Ave,  
15213 Pittsburgh, PA, USA  
Full list of author information is  
available at the end of the article

## Additional methods

### Sequences and notation

In our experiments, we use protein sequence data for proteins GB1, BRCA1, and Spike to identify variants that improve a targeted, experimentally measured quantity. In order to run our analyses, it is necessary to have a wildtype sequence for each of these proteins to use as a starting point. We use the following wildtype sequences for each of these proteins:

GB1: MTYKLILNGKTLKGETTTEAVDAATAEKVFKQYANDNGVD  
GEWTYDDATKTFVTTE

BRCA1: MDLSALRVEEVQNVINAMQKILECPICLELIKEPVSTKCD  
HIFCKFCMLKLLNQKKGPSQCPLCKNDITKRSLQESTRFS  
QLVEELLKIICAFQLDTGLEAYN

Spike: NLCPPFGEVFNATRFASVYAWNRRKRISNCVADYSVLVNSAS  
FSTFKCYGVSPTKLNDLCFTNVYADSFVIRGDEVRIAPG  
QTGKIADYNYKLPDDFTGCVIAWNSNLDKSVGGNYNYLY  
RLFRRKSNLKPFERDISTEIQAGSTPCNGVEGFNCYFPLQ  
SYGFQPTNGVGYQPYRVVLSFELLHAPATVCG

When referring to a sequence, the coordinates we use are with respect to the wildtype sequences above. That is, the first amino acid of each sequence corresponds to position 1, and so on. When we refer to a variant sequence, we use the notation ‘X#Y,’ where X is the wildtype amino acid, # is an integer denoting the position, and Y is the variant amino acid.

### Fold family specific generative models of protein sequences

Our method can incorporate generative models of protein sequences for the fold family to which the target protein belongs. We evaluated two options for such models, (i) an MRF model learned using the GREMLIN algorithm [1], and (ii) a profile HMM. We downloaded the profile HMM [2] for the fold family to which GB1 belongs (Pfam id: PF01378) from the Pfam database [3]. We also downloaded the multiple sequence alignment that was used to train the HMM from Pfam, and then used the alignment to train the GREMLIN model. Thus, the GREMLIN and HMM models were trained from the same sequence data. We used these models to compute the log-odds of each design. These log-odds are used as a regularization factor in the Bayesian optimization. The two models make different assumptions about the conditional independencies among the residues in the distribution over

GB1 sequences, and thus will output different log-odds scores for the same design, in general. Importantly, these are well-suited to training from limited sets of data, especially when compared to deep models. GREMLIN in particular learns a sparse model precisely to resist overfitting, and is thus better suited to learning from relatively small amounts of data.

## Additional results

Evolutionary-based regularization of GB1 with GREMLIN and profile-HMM log-odds

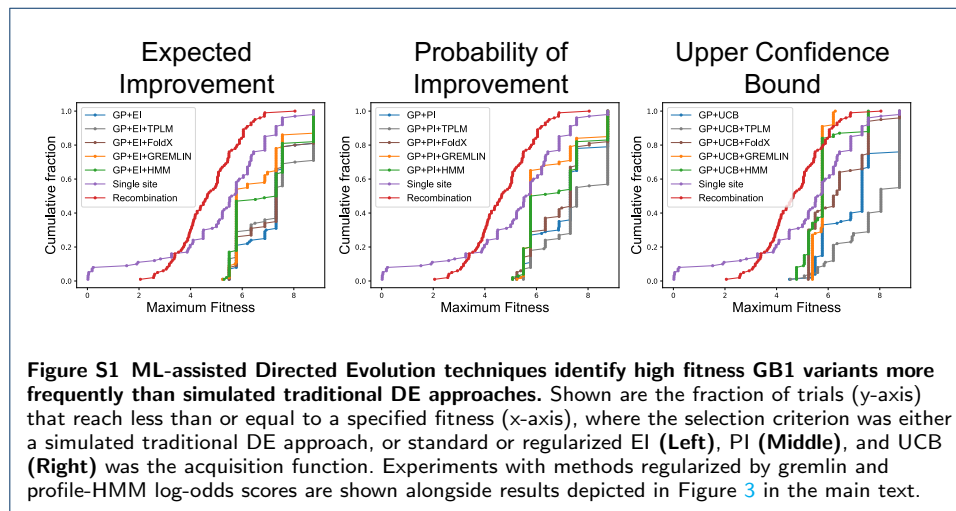

Our experiments using GREMLIN and HMM regularized approaches follow the same sequential strategy used by experiments outlined in the main text. In Figure S1, we show how they compare to simulated traditional approaches, as well as those regularized by TPLM and FoldX. When EI or PI is used as the acquisition function, GREMLIN and HMM-based regularization typically identify variants with higher fitness relative to traditional approaches. Compared to the other ML-assisted methods, these approaches tend to identify variants with slightly lower fitness. When UCB is the acquisition function, we find that GREMLIN and HMM-based regularization outperform traditional approaches in roughly half of trials, but is outperformed by other ML-assisted approaches in most trials.

In Figure S2-top, we show the same results with GB1 from main text Figure 2 with the addition of GREMLIN and HMM regularized trials. While these additions do greatly improve upon wildtype GB1 fitness, with the exception of using structure-based regularization and UCB acquisition, other ML-assisted DE approaches, regularized or not, identify higher fitness GB1 variants. In Figure S2-bottom, we show that GREMLIN and HMM-based regularization has the intended effect of biasing variant selections towards those that have high log odds under each model. Putting together these results, when performing evolutionary-based regularization, TPLM is the best option for generative model compared to GREMLIN or profile-HMMs.

### Additional sequence-space exploration experiments

In the main text, we describe how regularization induces site-specific exploration of unexplored sequence space. In the Discussion, we note that this behavior occurs for all regularization types, acquisition functions, and protein types that we

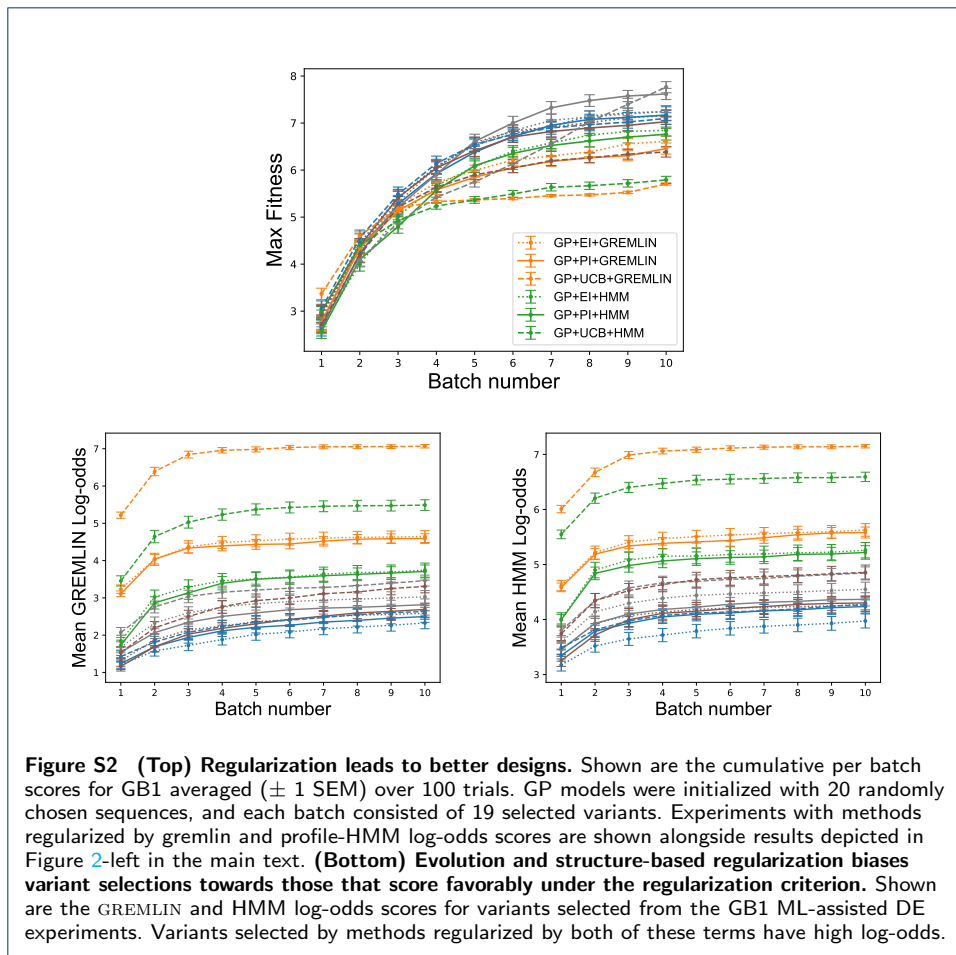

investigated. Figures S3-S5 show these results for each of GB1, BRCA1, and Spike, respectively. Columns from left to right show TPLM-based regularization, structure-based regularization, and unregularized approaches, and rows from top to bottom show experiments with UCB, EI, then PI acquisition functions. As described previously, we observe localized shading with greater intensity in regularized approaches compared to the unregularized ones. Even with GB1 where there is clearly more exploration at residues 40 and 39 compared to 41 and 54 regardless of regularization, there tends to be darker shading in the regularized approaches.

Predictions on unseen data

**Table S1** Predictions made on held out data for each protein type, averaged across all regularization types. MSE refers to the mean square error over all predictions. Fitness/Activity/Affinity refers to the average true value for the predicted top sequence obtained for each method.

| Regularization | GB1  |         | BRCA1 |          | Spike |          |
|----------------|------|---------|-------|----------|-------|----------|
|                | MSE  | Fitness | MSE   | Activity | MSE   | Affinity |
| Unregularized  | 1.96 | 4.99    | 0.14  | 1.47     | 0.04  | 0.93     |
| TPLM           | 2.22 | 5.05    | 0.15  | 1.46     | 0.02  | 0.93     |
| FoldX          | 1.89 | 5.04    | 0.14  | 1.35     | 0.04  | 0.92     |

In the main text, we characterize the batched variant sequence selections made by ML-assisted DE techniques with and without evolution or structure-based regularization. These selections allowed us to iteratively update GP models using sequences

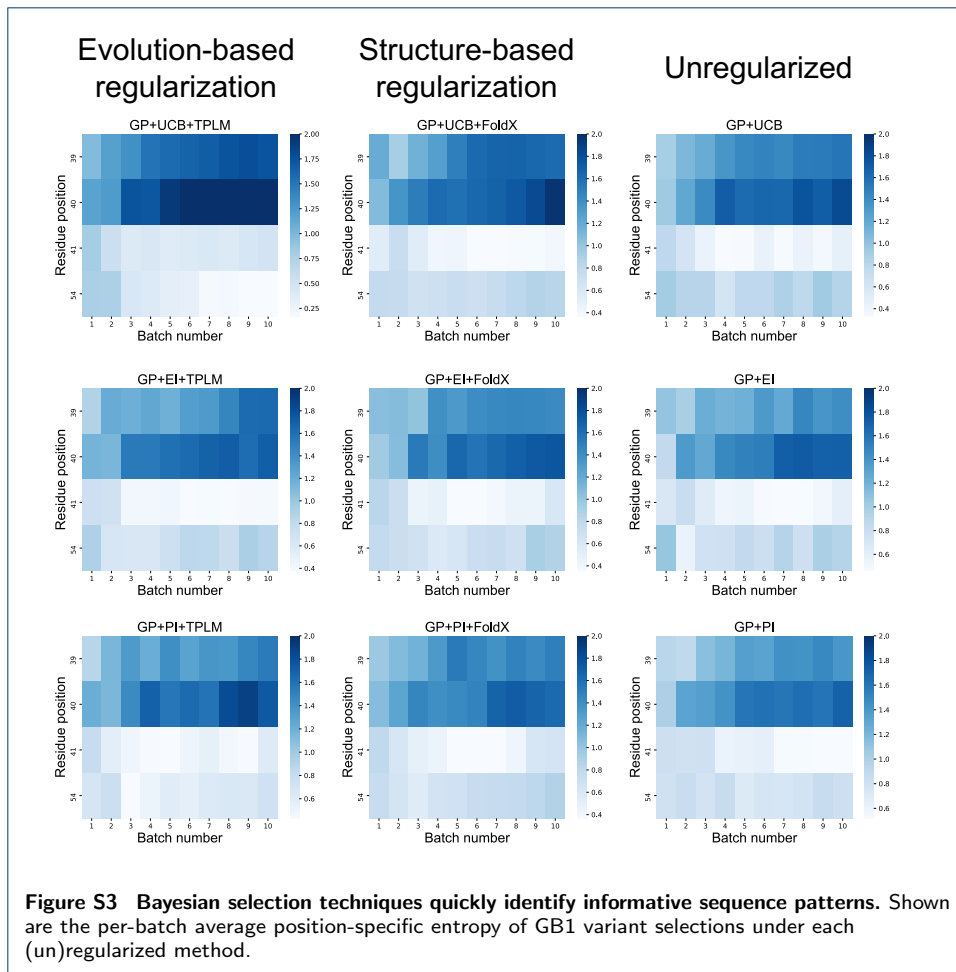

that each model expected to be informative. To demonstrate the continued predictive capability of these models, we used them to predict the respective objectives of a held out test set for each protein. We emphasize that these sequences were never seen by the models during the iterative variant selection stage of each trial, and that they constitute a random subsample (20%) of the data for each protein.

For each protein, we used the models from the end of each trial to identify what they believe to be the best variant from the held out testing data. Table S1 shows the average mean squared error (MSE) averaged across all trials and acquisition types for each form of regularization. Additionally, it shows the average true value of this predicted best sequence. With GB1, we find that all models are high error, but do a good job at identifying a high fitness variant. With BRCA1, the models have better accuracy, and consistently identify a variant that improves upon wildtype E3 ubiquitin ligase activity. With Spike, all model types have good accuracy, and the top predicted sequence is generally comparable to wildtype ACE2 binding affinity. Thus, even when the models have relatively low accuracy, they are able to identify sequences that are comparable to or better than the wildtype sequence, similar to previous results [4].

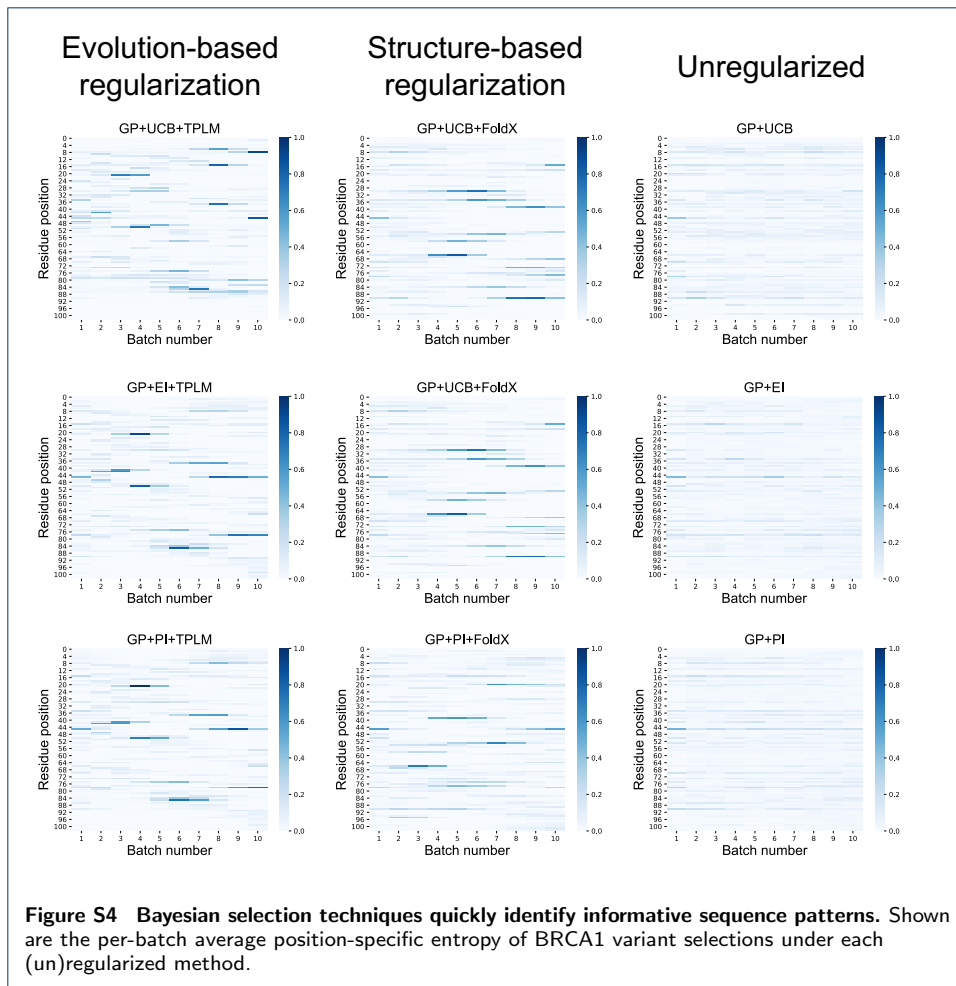

**Abbreviations not listed in main text**

MRF-derived regularized Bayesian optimization approaches:

- **GP+EI+GREMLIN:** Gaussian process with GREMLIN log-odds regularized expected improvement acquisition
- **GP+PI+GREMLIN:** Gaussian process with GREMLIN log-odds regularized probability of improvement acquisition
- **GP+UCB+GREMLIN:** Gaussian process with GREMLIN log-odds regularized upper confidence bound acquisition

HMM-derived regularized Bayesian optimization approaches:

- **GP+EI+HMM:** Gaussian process with HMM log-odds regularized expected improvement acquisition
- **GP+PI+HMM:** Gaussian process with HMM log-odds regularized probability of improvement acquisition
- **GP+UCB+HMM:** Gaussian process with HMM log-odds regularized upper confidence bound acquisition

**References**

1. Balakrishnan, S., Kamisetty, H., Carbonell, J.C., Lee, S.I., C.J., L.: Learning Generative Models for Protein Fold Families. *Proteins: Structure, Function, and Bioinformatics* **79**(6), 1061–1078 (2011)
2. Krogh, A., Brown, M., Mian, I.S., Sjölander, K., Haussler, D.: Hidden Markov Models in Computational Biology. *Journal of Molecular Biology* **235**(5), 1501–1531 (1994). doi:[10.1006/jmbi.1994.1104](https://doi.org/10.1006/jmbi.1994.1104)
3. El-Gebali, S., Mistry, J., Bateman, A., Eddy, S.R., Luciani, A., Potter, S.C., Qureshi, M., Richardson, L.J., Salazar, G.A., Smart, A., Sonnhammer, E.L.L., Hirsh, L., Paladin, L., Piovesan, D., Tosatto, S.C.E., Finn, R.D.: The Pfam protein families database in 2019. *Nucleic Acids Research* **47**(D1), 427–432 (2018). doi:[10.1093/nar/gky995](https://doi.org/10.1093/nar/gky995)
4. Wu, Z., Kan, S.B.J., Lewis, R.D., Wittmann, B.J., Arnold, F.H.: Machine learning-assisted directed protein evolution with combinatorial libraries. *Proceedings of the National Academy of Sciences* **116**(18), 8852–8858

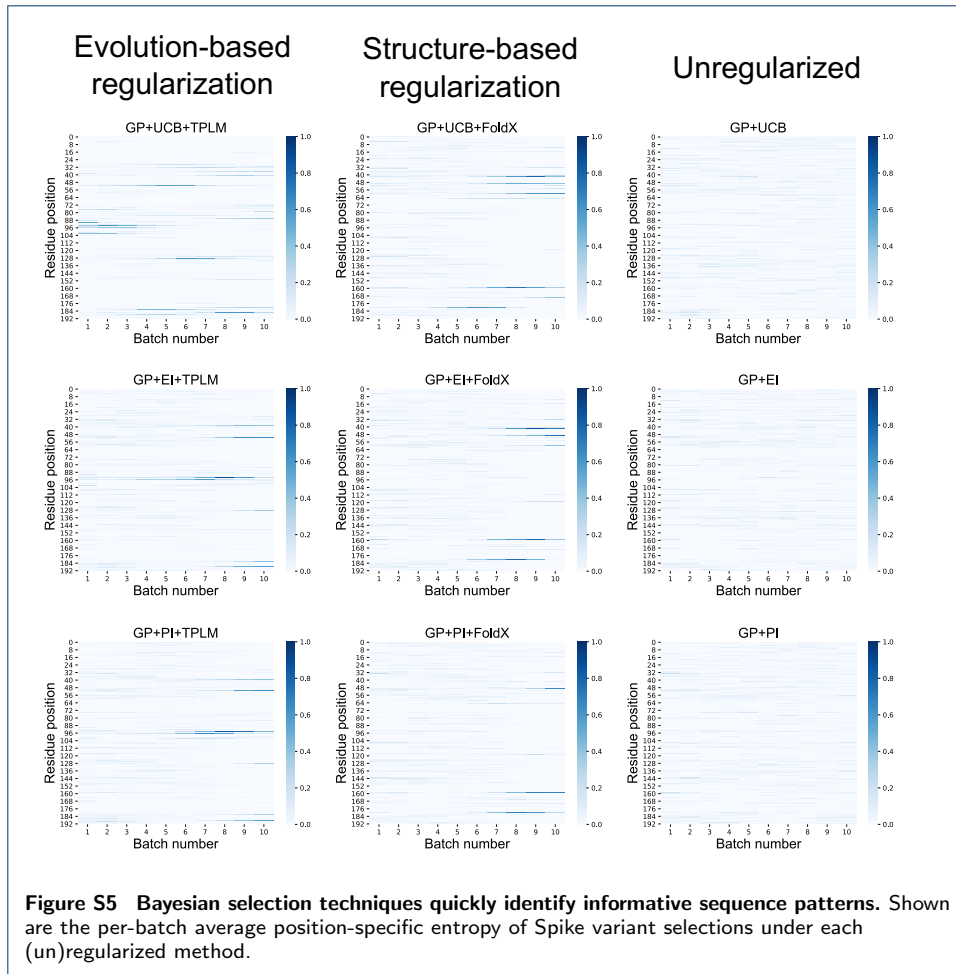

**Figure S5 Bayesian selection techniques quickly identify informative sequence patterns.** Shown are the per-batch average position-specific entropy of Spike variant selections under each (un)regularized method.

(2019)
